# Supplementary material
Source: PubMed Central journal article supplement (PMC5807249)
Supplement: NIHMS893341-supplement-1.pdf [file NIHMS893341-supplement-1.pdf]

## Deep Immune Profiling of an Arginine-Enriched Nutritional Intervention in Patients Undergoing Surgery

### SUPPLEMENTARY MATERIALS:

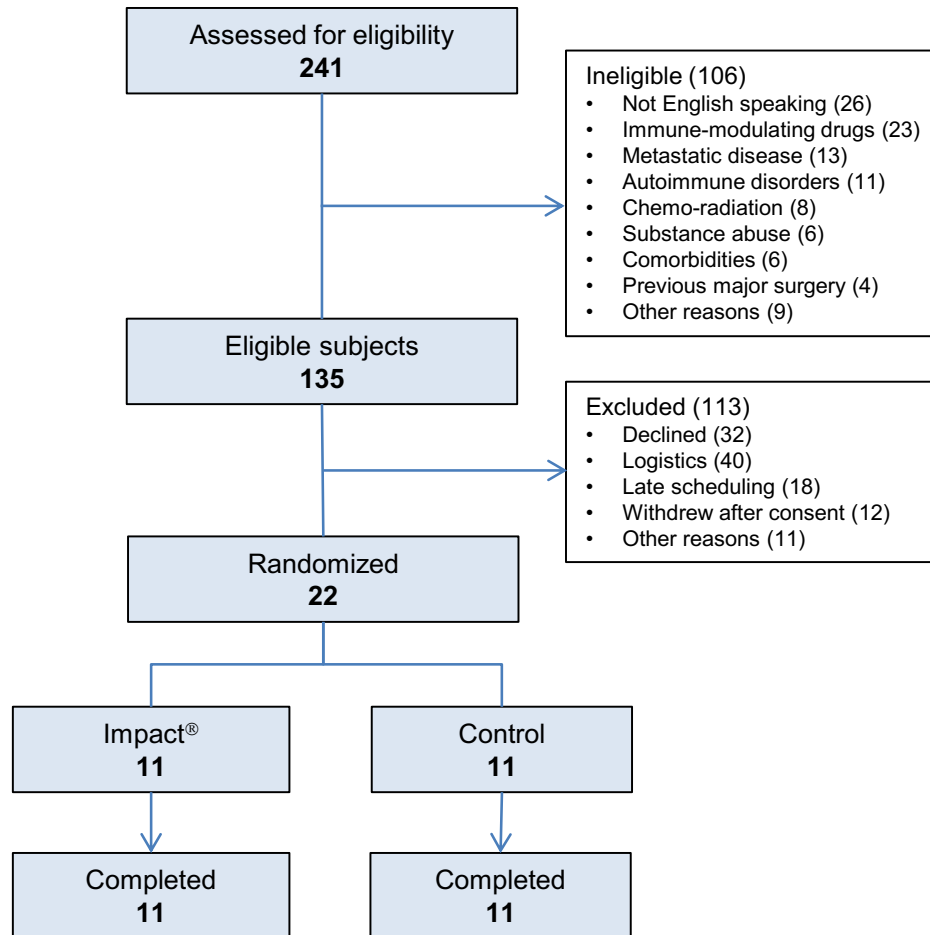

**Supplemental Figure 1: Consort chart and inclusion/exclusion criteria.** Inclusion criteria were 1) colon surgery, 2) age between 18 and 90 years, and 3) willing and able to sign an informed consent form and Health Insurance and Portability and Accountability Act (HIPAA) authorization, and to comply with study procedures. Changes in inclusion criteria as initially posted on ClinicalTrials.gov included 1) extending indications for colon surgery to non-cancerous conditions, and 2) increasing the maximum age from 65 to 90 years. Exclusion criteria were 1) immune-suppressant therapy within the last month (e.g., azathioprine or cyclosporine), 2) chemo-radiation within the last month, 3) chronic medication with potential immune-modulatory effects (e.g., daily oral morphine-equivalent intake > 30 mg or daily prednisone intake > 10 mg), 4) active infectious disease within 2 months, 5) significant metabolic disease (e.g., diabetes type I), 6) clinically significant organ dysfunction including renal and hepatic dysfunction, 7) significant cardiovascular and respiratory comorbidities resulting in impaired function and frailty, 8) autoimmune disease (e.g., lupus), 9) substance abuse (e.g., alcoholism, drug dependency), 10) undernourished as indicated by a weight loss > 10% during the last 6 months, 11) galactosemia, 12) previous

major abdominal surgery, 13) participation in another clinical trial of an investigational drug or device within the last 30 days that, in the investigator's opinion, would create increased risk to the participant or compromise the integrity of the study, 14) pregnancy, and 15) other conditions compromising a participant's safety or the integrity of the study. Changes in exclusion criteria as initially posted on ClinicalTrials.gov included 1) shortening of the time span between the last intake of an immunosuppressant drug and the time of surgery to 1 month, 2) shortening of the time span between chemo-radiation and the time of surgery to 1 month, 3) allowing daily intake of low-dose steroids ( $\leq 10$  mg prednisone-equivalent), 4) inclusion of patients with metastatic disease if considered curable, 5) inclusion of patients with ulcerative colitis or Crohn's disease, 6) inclusion of patients having had major abdominal surgery  $> 6$  months ago. Initial inclusion and exclusion criteria were changed because they were highly conservative and restricted patient recruitment.

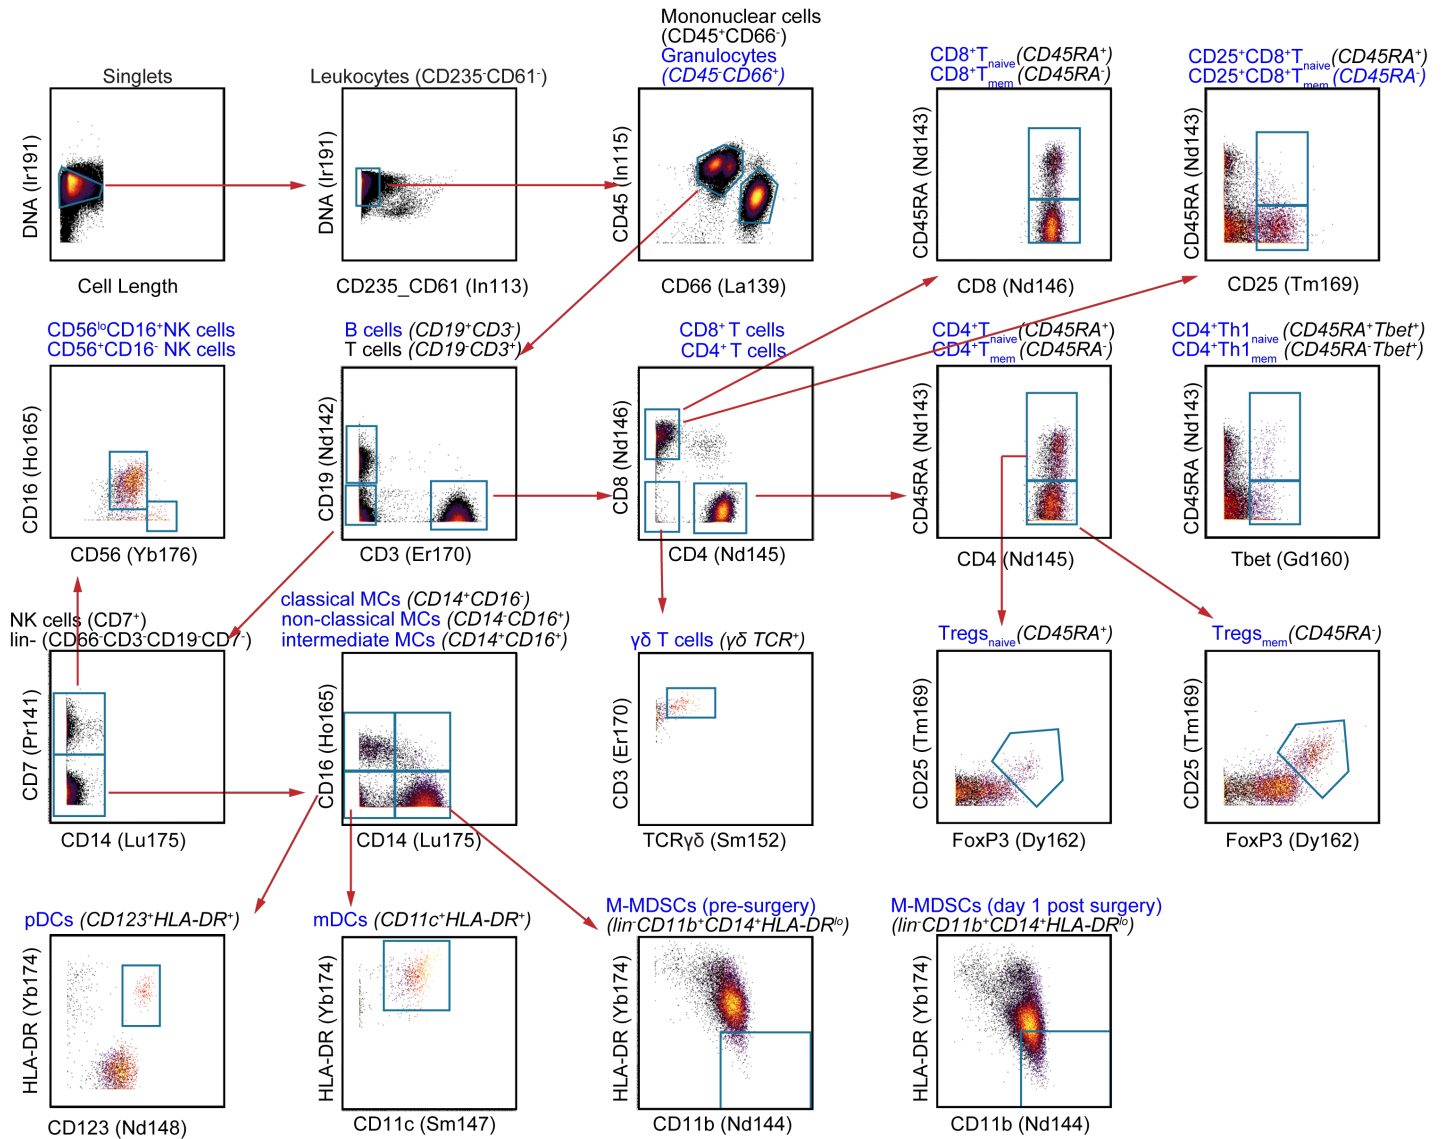

**Supplemental Figure 2: Gating strategy of immune cell subsets.** Two-dimensional flow cytometry plots are shown for a representative patient sample. Gating was performed using Cytobank software ([www.cytobank.org](http://www.cytobank.org)). Twenty-three manually gated cell subsets (blue font) were included. This analysis included all innate and adaptive cellular immune changes that were previously detected by mass cytometry in patients undergoing surgery (1). Abbreviations are NK: Natural Killer, cMC: classical monocytes, ncMC: non-classical monocytes, intMC: intermediate monocytes, pDC: plasmacytoid dendritic cell, mDC: myeloid dendritic cell, mem: memory, T<sub>regs</sub>: regulatory T cells, TCR: T cell receptor, and M-MDSC: monocytic MDSCs. The M-MDSC phenotype is based on recent recommendations for the identification of MDSC subsets. The M-MDSC gate is shown for samples from a representative patient before (day 0) and 1 day after surgery (27).

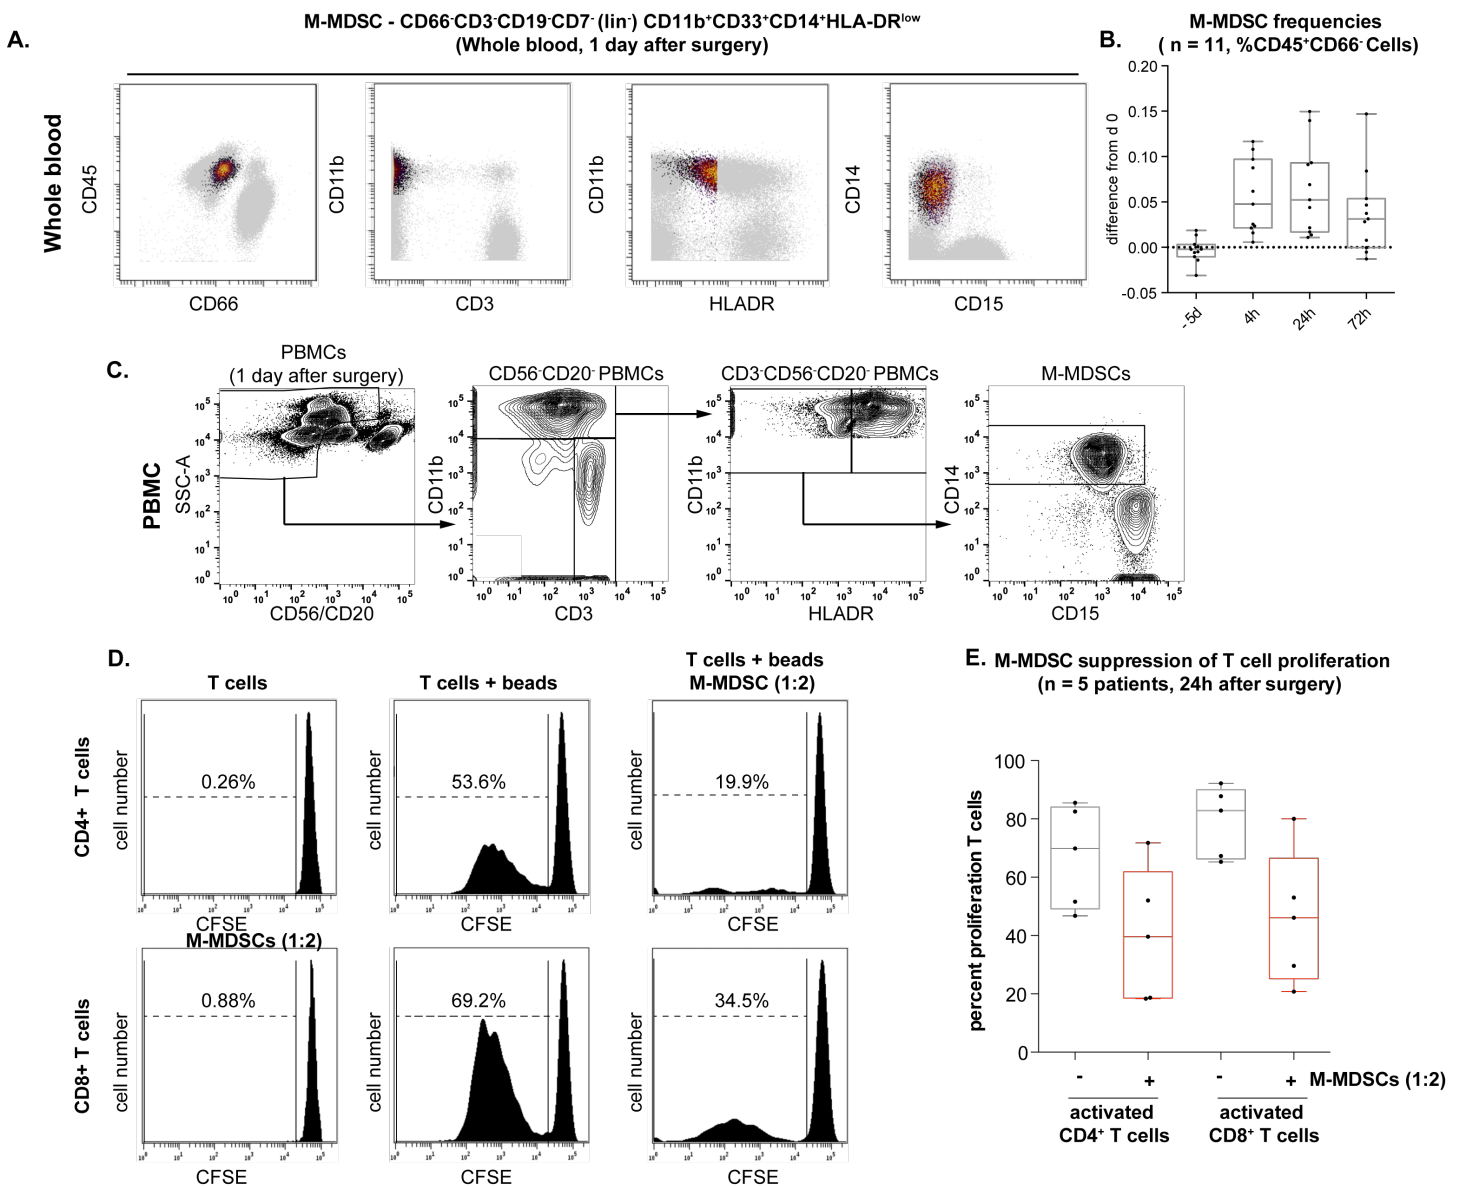

### Supplemental Figure 3: Identification and characterization of monocytic myeloid-derived suppressor cells.

(A) Shown are two-dimensional flow cytometry plots of M-MDSCs gated from whole blood samples 1 day after surgery (see gating strategy Supplemental Figure 2). Gated M-MDSCs (colored dots) are overlaid onto all peripheral leukocytes (CD235<sup>-</sup>CD61<sup>-</sup> cells) to visualize their phenotype. M-MDSCs are lineage<sup>-</sup> (CD66<sup>+</sup>CD3<sup>-</sup>CD7<sup>-</sup>CD19<sup>-</sup>), CD11b<sup>+</sup>CD14<sup>+</sup>, HLA-DR<sup>low</sup>, and CD15<sup>-</sup>. (B) M-MDSC frequency changes with respect to day 0 (1h before surgery) at peri-operative time points -5d (before surgery), and 4h, 24h, and 72h after surgery in samples from patients in the control group (n = 11). M-MDSC frequency peaked 1 day after surgery (median fold increase 5.6, standard deviation 4.3, p = 0.001). (C-E) T cell suppression assays performed in PBMC samples collected from 5 patients 1 day after surgery. (C) Gating of lin<sup>-</sup>CD15<sup>-</sup>CD11b<sup>+</sup>CD14<sup>+</sup>HLA-DR<sup>low</sup> M-MDSCs from PBMCs samples. (D) Representative histograms of Carboxyfluorescein succinimidyl ester (CFSE) expression in CD4<sup>+</sup> (upper panels) or CD8<sup>+</sup> (lower panels) T cells. Activating (anti-CD3/CD128) beads were titrated to obtain 50-80% proliferating T cells after 5 days in culture (dashed line, middle panels). Activated T cells were co-cultured in the absence or presence of M-MDSCs at a 1:2 M-MDSC to T cell ratio (right panels). (E) M-MDSCs suppressed both CD4<sup>+</sup> (p = 0.03, n = 5) and CD8<sup>+</sup> T cell proliferation (p = 0.03, n = 5). \*\*\* p < 0.001, \*\* p < 0.01, \* p < 0.05, Wilcoxon match-pairs sign rank test.

| Covariates                              | Unstandardized Coefficients $\beta$ | Standard Error | Standardized Coefficients $\beta$ | t             | p-value      |
|-----------------------------------------|-------------------------------------|----------------|-----------------------------------|---------------|--------------|
| y-intercept                             | -0.341                              | 0.604          |                                   | -0.565        | 0.58         |
| <b>AES Treatment</b>                    | <b>-1.046</b>                       | <b>0.244</b>   | <b>-0.838</b>                     | <b>-4.287</b> | <b>0.001</b> |
| Age                                     | 0.007                               | 0.014          | 0.141                             | 0.517         | 0.612        |
| Sex                                     | 0.385                               | 0.225          | 0.287                             | 1.712         | 0.108        |
| Race                                    | -0.078                              | 0.233          | -0.062                            | -0.332        | 0.744        |
| Diagnosis of malignancy                 | 0.329                               | 0.321          | 0.235                             | 1.026         | 0.321        |
| Open vs. laparoscopic surgery           | 0.208                               | 0.257          | 0.149                             | 0.81          | 0.43         |
| (Dependent Variable: Elastic Net Value) |                                     |                |                                   |               |              |

**Supplemental Table 1: Effect of demographic, clinical, and surgical variables on elastic net model association with AES treatment.** Multiple linear regression was calculated using SPSS version 20 to determine whether any demographic or surgical variables were confounders for the effect of AES treatment on the EN value. The model used the EN value as the dependent variable and AES treatment, age, race, sex, gender, presence of malignancy, and surgical approach (open or laparoscopic) as covariates. The results indicated that the effect of AES treatment remained highly significant as an independent predictor of the EN value (p-value = 0.001). Multiple linear regression was used to assess whether demographic factors, presence of malignancy, or surgical approach were confounders for the effect of AES treatment on the individual key elastic net model components. The effect of AES treatment remained significant as an independent predictor of the pSTAT1 signal in CD25<sup>+</sup>CD8<sup>+</sup> T<sub>mem</sub> cells (residual p-value = 0.004), the pSTAT3 signal in CD25<sup>+</sup>CD8<sup>+</sup> T<sub>mem</sub> cells (residual p-value = 0.035), and MAPKAPK2 in M-MDSCs (residual p-value = 0.008).

| Antigen               | Supplier  | Symbol | Atomic Mass | Clone              | Comment   |
|-----------------------|-----------|--------|-------------|--------------------|-----------|
| Barcode 1             |           | Pd     | 102         |                    | Barcode   |
| Barcode 2             |           | Pd     | 104         |                    | Barcode   |
| Barcode 3             |           | Pd     | 105         |                    | Barcode   |
| Barcode 4             |           | Pd     | 106         |                    | Barcode   |
| Barcode 5             |           | Pd     | 108         |                    | Barcode   |
| Barcode 6             |           | Pd     | 110         |                    | Barcode   |
| CD235ab               | Biolegend | In     | 113         | HIR2               | phenotype |
| CD61                  | BD        | In     | 113         | VI-PL2             | phenotype |
| CD45                  | Biolegend | In     | 115         | HI30               | phenotype |
| CD66                  | BD        | La     | 139         | CD66 $\alpha$ -    | phenotype |
| CD7                   | BD        | Pr     | 141         | M-T701             | phenotype |
| CD19                  | Fluidigm  | Nd     | 142         | HIB19              | phenotype |
| CD45RA                | Fluidigm  | Nd     | 143         | HI100              | phenotype |
| CD11b                 | Fluidigm  | Nd     | 144         | ICRF44             | phenotype |
| CD4                   | Fluidigm  | Nd     | 145         | RPA-T4             | phenotype |
| CD8a                  | Fluidigm  | Nd     | 146         | RPA-T8             | phenotype |
| CD11c                 | Fluidigm  | Sm     | 147         | Bu15               | phenotype |
| CD123                 | Biolegend | Nd     | 148         | 6H6                | phenotype |
| pCREB                 | CST       | Sm     | 149         | 87G3               | function  |
| pSTAT5                | Fluidigm  | Nd     | 150         | 47                 | function  |
| pP38                  | CST       | Eu     | 151         | 36/p38/pT184/pT182 | function  |
| TCR $\gamma$ $\delta$ | Fluidigm  | Sm     | 152         | GL3                | phenotype |
| pSTAT1                | Fluidigm  | Eu     | 153         | 58D6               | function  |
| pSTAT3                | BD        | Sm     | 154         | 4/P pY705          | function  |
| prpS6                 | CST       | Gd     | 155         | N7-548             | function  |
| CD33                  | Fluidigm  | Gd     | 158         | WM53               | phenotype |
| pMAPKAPK2             | Fluidigm  | Tb     | 159         | 27B7               | function  |
| Tbet                  | Fluidigm  | Gd     | 160         | 4B10               | phenotype |
| FoxP3                 | Fluidigm  | Dy     | 162         | PCH101             | phenotype |
| I $\kappa$ B          | Fluidigm  | Dy     | 164         | L35A5              | function  |
| CD16                  | Fluidigm  | Ho     | 165         | 3G8                | phenotype |
| pNF $\kappa$ B        | Fluidigm  | Er     | 166         | K10-               | function  |
| pERK1/2               | CST       | Er     | 167         | D13.14.4E          | function  |
| CD25                  | Fluidigm  | Tm     | 169         | 2A3                | phenotype |
| CD3                   | Fluidigm  | Er     | 170         | UCHT1              | phenotype |
| CD15                  | Fluidigm  | Yb     | 172         | W6D3               | phenotype |
| HLA-DR                | Fluidigm  | Yb     | 174         | L243               | phenotype |
| CD14                  | Fluidigm  | Yb     | 175         | M52E               | phenotype |
| CD56                  | Fluidigm  | Yb     | 176         | NCAM16.2           | phenotype |
| DNA1                  |           | Ir     | 191         |                    |           |
| DNA2                  |           | Ir     | 192         |                    |           |

Supplemental Table 2: Antibody panel used for mass cytometry analysis

| Fluorophore | Sort Panel     |              |           | Day 5 Suppression Panel |          |            |
|-------------|----------------|--------------|-----------|-------------------------|----------|------------|
|             | Antigen        | Clone        | Supplier  | Antigen                 | Clone    | Supplier   |
| FITC        | CD19/CD56      | H1B19/5.1H11 | Biologend | CFSE                    |          | Invitrogen |
| PE          | CD3            | OKT3         | Biologend | CD25                    | BC96     | Biologend  |
| APC         | CD11b          | ICRF44       | Biologend |                         |          |            |
| APC-H7      | CD14           | MfP9         | BD        | CD8                     | SK1      | BD         |
| PE-Cy7      | CD11c          | B-Ly6        | BD        | CD279                   | EH12.2H7 | Biologend  |
| PerCp-Cy5.5 |                |              |           | CD45RO                  | UCHL1    | Biologend  |
| PE-CF594    | HLA-DR         | L243         | Biologend | CD62L                   | DREG56   | BD         |
| Pac Blue    | CD15           | SSEA-1       | Biologend |                         |          |            |
| Aqua        | Aqua Live/Dead | BL           | Biologend | Aqua Live/Dead          |          | Biologend  |
| BV 570      |                |              |           | CD4                     | RPA-T4   | Biologend  |
| BV 605      | CD16           | 3G8          | Biologend | CD127                   | A019D5   | Biologend  |
| BV 785      |                |              |           | CD3                     | OKT3     | Biologend  |

Supplemental Table 3: Antibody panels used in MDSC suppression assays
